# Supplementary material
Source: publisher figshare collection journal article supplement (https://acs.figshare.com/ndownloader/files/4270630)
Supplement: Supplementary file 1 [file 4270630]

 
data_kw210sa 
  
_audit_creation_method            SHELXL-97 
_chemical_name_systematic 
; 
 ? 
; 
_chemical_name_common             ? 
_chemical_melting_point           ? 
_chemical_formula_moiety           'C20 H23 N3 O7' 
_chemical_formula_sum 
 'C20 H23 N3 O7' 
_chemical_formula_weight          417.41 
  
loop_ 
 _atom_type_symbol 
 _atom_type_description 
 _atom_type_scat_dispersion_real 
 _atom_type_scat_dispersion_imag 
 _atom_type_scat_source 
 'C'  'C'   0.0033   0.0016 
 'International Tables Vol C Tables 4.2.6.8 and 6.1.1.4' 
 'H'  'H'   0.0000   0.0000 
 'International Tables Vol C Tables 4.2.6.8 and 6.1.1.4' 
 'N'  'N'   0.0061   0.0033 
 'International Tables Vol C Tables 4.2.6.8 and 6.1.1.4' 
 'O'  'O'   0.0106   0.0060 
 'International Tables Vol C Tables 4.2.6.8 and 6.1.1.4' 
  
_symmetry_cell_setting            Monoclinic 
_symmetry_space_group_name_H-M    P2(1)/c 
_symmetry_space_group_name_Hall    '-P 2ybc' 
  
loop_ 
 _symmetry_equiv_pos_as_xyz 
 'x, y, z' 
 '-x, y+1/2, -z+1/2' 
 '-x, -y, -z' 
 'x, -y-1/2, z-1/2' 
  
_cell_length_a                    11.759(2) 
_cell_length_b                    23.045(4) 
_cell_length_c                    7.7057(14) 
_cell_angle_alpha                 90.00 
_cell_angle_beta                  107.406(2) 
_cell_angle_gamma                 90.00 
_cell_volume                      1992.6(6) 
_cell_formula_units_Z             4 
_cell_measurement_temperature     100(2) 
_cell_measurement_reflns_used     6066 
_cell_measurement_theta_min       3.84 
_cell_measurement_theta_max       28.98 
  
_exptl_crystal_description        block 
_exptl_crystal_colour             colorless 
_exptl_crystal_size_max           0.30 
_exptl_crystal_size_mid           0.30 
_exptl_crystal_size_min           0.10 
_exptl_crystal_density_meas       ? 
_exptl_crystal_density_diffrn     1.391 
_exptl_crystal_density_method     'not measured' 
_exptl_crystal_F_000              880 
_exptl_absorpt_coefficient_mu     0.107 
_exptl_absorpt_correction_type    'multi-scan' 
_exptl_absorpt_correction_T_min   0.9378 
_exptl_absorpt_correction_T_max   0.9894 
_exptl_absorpt_process_details    'Sadabs (Bruker)' 
  
_exptl_special_details 
; 
 ? 
; 
  
_diffrn_ambient_temperature       100(2) 
_diffrn_radiation_wavelength      0.71073 
_diffrn_radiation_type            MoK\a 
_diffrn_radiation_source          'fine-focus sealed tube' 
_diffrn_radiation_monochromator   graphite 
_diffrn_measurement_device_type   'Bruker APEX-II CCD' 
_diffrn_measurement_method        '\f and \w scans' 
_diffrn_detector_area_resol_mean  ? 
_diffrn_reflns_number             27165 
_diffrn_reflns_av_R_equivalents   0.0386 
_diffrn_reflns_av_sigmaI/netI     0.0351 
_diffrn_reflns_limit_h_min        -16 
_diffrn_reflns_limit_h_max        16 
_diffrn_reflns_limit_k_min        -32 
_diffrn_reflns_limit_k_max        33 
_diffrn_reflns_limit_l_min        -10 
_diffrn_reflns_limit_l_max        11 
_diffrn_reflns_theta_min          3.74 
_diffrn_reflns_theta_max          30.76 
_reflns_number_total              5876 
_reflns_number_gt                 4460 
_reflns_threshold_expression      >2sigma(I) 
  
_computing_data_collection        'Bruker APEX2' 
_computing_cell_refinement        'Bruker SAINT' 
_computing_data_reduction         'Bruker SAINT' 
_computing_structure_solution     'SHELXS-97 (Sheldrick, 2008)' 
_computing_structure_refinement   'SHELXL-97 (Sheldrick, 2008)' 
_computing_molecular_graphics     'Bruker SHELXTL' 
_computing_publication_material   'Bruker SHELXTL' 
  
_refine_special_details 
; 
 Refinement of F^2^ against ALL reflections.  The weighted R-factor wR and 
 goodness of fit S are based on F^2^, conventional R-factors R are based 
 on F, with F set to zero for negative F^2^. The threshold expression of 
 F^2^ > 2sigma(F^2^) is used only for calculating R-factors(gt) etc. and is 
 not relevant to the choice of reflections for refinement.  R-factors based 
 on F^2^ are statistically about twice as large as those based on F, and R- 
 factors based on ALL data will be even larger. 
; 
  
_refine_ls_structure_factor_coef  Fsqd 
_refine_ls_matrix_type            full 
_refine_ls_weighting_scheme       calc 
_refine_ls_weighting_details 
 'calc w=1/[\s^2^(Fo^2^)+(0.0592P)^2^+0.4470P] where P=(Fo^2^+2Fc^2^)/3' 
_atom_sites_solution_primary      direct 
_atom_sites_solution_secondary    difmap 
_atom_sites_solution_hydrogens    geom 
_refine_ls_hydrogen_treatment     constr 
_refine_ls_extinction_method      none 
_refine_ls_extinction_coef        ? 
_refine_ls_number_reflns          5876 
_refine_ls_number_parameters      273 
_refine_ls_number_restraints      0 
_refine_ls_R_factor_all           0.0619 
_refine_ls_R_factor_gt            0.0440 
_refine_ls_wR_factor_ref          0.1219 
_refine_ls_wR_factor_gt           0.1116 
_refine_ls_goodness_of_fit_ref    1.055 
_refine_ls_restrained_S_all       1.055 
_refine_ls_shift/su_max           0.006 
_refine_ls_shift/su_mean          0.001 
  
loop_ 
 _atom_site_label 
 _atom_site_type_symbol 
 _atom_site_fract_x 
 _atom_site_fract_y 
 _atom_site_fract_z 
 _atom_site_U_iso_or_equiv 
 _atom_site_adp_type 
 _atom_site_occupancy 
 _atom_site_symmetry_multiplicity 
 _atom_site_calc_flag 
 _atom_site_refinement_flags 
 _atom_site_disorder_assembly 
 _atom_site_disorder_group 
O1 O 0.58175(9) 0.14506(4) 0.57466(15) 0.0312(2) Uani 1 1 d . . . 
O2 O 0.72307(9) 0.18685(4) 0.49505(16) 0.0355(3) Uani 1 1 d . . . 
O3 O 0.16915(9) 0.54083(4) 0.63533(14) 0.0294(2) Uani 1 1 d . . . 
O4 O 0.35800(8) 0.51798(4) 0.31671(14) 0.0265(2) Uani 1 1 d . . . 
O5 O 0.18580(8) 0.48983(4) 0.11530(13) 0.0235(2) Uani 1 1 d . . . 
O6 O 0.23618(9) 0.34289(4) -0.01503(14) 0.0276(2) Uani 1 1 d . . . 
O7 O 0.07955(8) 0.30657(4) 0.05813(12) 0.01994(19) Uani 1 1 d . . . 
N1 N 0.62905(10) 0.18823(4) 0.53335(15) 0.0228(2) Uani 1 1 d . . . 
N2 N 0.32236(9) 0.41089(4) 0.62401(14) 0.0189(2) Uani 1 1 d . . . 
N3 N 0.22539(9) 0.45084(4) 0.56379(14) 0.0194(2) Uani 1 1 d . . . 
C1 C 0.56941(11) 0.24474(5) 0.52912(17) 0.0197(2) Uani 1 1 d . . . 
C2 C 0.45710(12) 0.24576(5) 0.55033(19) 0.0238(3) Uani 1 1 d . . . 
H2 H 0.4195 0.2109 0.5702 0.029 Uiso 1 1 calc R . . 
C3 C 0.40029(11) 0.29893(5) 0.54198(19) 0.0234(3) Uani 1 1 d . . . 
H3 H 0.3232 0.3006 0.5576 0.028 Uiso 1 1 calc R . . 
C4 C 0.45488(11) 0.35007(5) 0.51095(16) 0.0178(2) Uani 1 1 d . . . 
C5 C 0.56945(11) 0.34747(5) 0.49433(18) 0.0209(2) Uani 1 1 d . . . 
H5 H 0.6081 0.3822 0.4771 0.025 Uiso 1 1 calc R . . 
C6 C 0.62808(11) 0.29460(5) 0.50258(18) 0.0221(3) Uani 1 1 d . . . 
H6 H 0.7060 0.2927 0.4904 0.027 Uiso 1 1 calc R . . 
C7 C 0.39015(10) 0.40790(5) 0.48874(16) 0.0169(2) Uani 1 1 d . . . 
H7 H 0.4507 0.4397 0.5155 0.020 Uiso 1 1 calc R . . 
C8 C 0.39626(12) 0.43695(5) 0.79831(17) 0.0225(3) Uani 1 1 d . . . 
H8A H 0.4819 0.4288 0.8182 0.027 Uiso 1 1 calc R . . 
H8B H 0.3728 0.4214 0.9023 0.027 Uiso 1 1 calc R . . 
C9 C 0.37149(11) 0.50206(5) 0.77659(18) 0.0233(3) Uani 1 1 d . . . 
H9A H 0.3785 0.5208 0.8950 0.028 Uiso 1 1 calc R . . 
H9B H 0.4260 0.5215 0.7189 0.028 Uiso 1 1 calc R . . 
C10 C 0.24426(12) 0.50287(5) 0.65376(17) 0.0210(2) Uani 1 1 d . . . 
C11 C 0.10949(11) 0.42502(6) 0.48324(19) 0.0244(3) Uani 1 1 d . . . 
H11A H 0.0496 0.4562 0.4421 0.029 Uiso 1 1 calc R . . 
H11B H 0.0874 0.4019 0.5766 0.029 Uiso 1 1 calc R . . 
C12 C 0.10682(11) 0.38678(5) 0.32559(17) 0.0196(2) Uani 1 1 d . . . 
H12 H 0.0370 0.3641 0.2776 0.024 Uiso 1 1 calc R . . 
C13 C 0.19207(10) 0.38110(5) 0.24494(16) 0.0165(2) Uani 1 1 d . . . 
C14 C 0.30707(10) 0.41584(5) 0.29312(16) 0.0165(2) Uani 1 1 d . . . 
H14 H 0.3527 0.4008 0.2119 0.020 Uiso 1 1 calc R . . 
C15 C 0.28694(11) 0.48046(5) 0.24753(17) 0.0183(2) Uani 1 1 d . . . 
C16 C 0.15815(13) 0.55032(5) 0.06043(19) 0.0272(3) Uani 1 1 d . . . 
H16A H 0.1084 0.5518 -0.0683 0.033 Uiso 1 1 calc R . . 
H16B H 0.2329 0.5718 0.0714 0.033 Uiso 1 1 calc R . . 
C17 C 0.09278(15) 0.57839(6) 0.1785(2) 0.0353(3) Uani 1 1 d . . . 
H17A H 0.0180 0.5576 0.1655 0.053 Uiso 1 1 calc R . . 
H17B H 0.0753 0.6189 0.1413 0.053 Uiso 1 1 calc R . . 
H17C H 0.1423 0.5770 0.3057 0.053 Uiso 1 1 calc R . . 
C18 C 0.17346(11) 0.34230(5) 0.08407(16) 0.0177(2) Uani 1 1 d . . . 
C19 C 0.05405(12) 0.27092(5) -0.10513(18) 0.0239(3) Uani 1 1 d . . . 
H19A H 0.1172 0.2414 -0.0920 0.029 Uiso 1 1 calc R . . 
H19B H 0.0509 0.2954 -0.2121 0.029 Uiso 1 1 calc R . . 
C20 C -0.06418(12) 0.24200(6) -0.12965(19) 0.0263(3) Uani 1 1 d . . . 
H20A H -0.0582 0.2155 -0.0278 0.039 Uiso 1 1 calc R . . 
H20B H -0.0868 0.2201 -0.2439 0.039 Uiso 1 1 calc R . . 
H20C H -0.1248 0.2715 -0.1332 0.039 Uiso 1 1 calc R . . 
  
loop_ 
 _atom_site_aniso_label 
 _atom_site_aniso_U_11 
 _atom_site_aniso_U_22 
 _atom_site_aniso_U_33 
 _atom_site_aniso_U_23 
 _atom_site_aniso_U_13 
 _atom_site_aniso_U_12 
O1 0.0365(6) 0.0159(4) 0.0398(6) 0.0016(4) 0.0090(5) 0.0003(4) 
O2 0.0314(6) 0.0247(5) 0.0542(7) -0.0036(4) 0.0185(5) 0.0055(4) 
O3 0.0294(5) 0.0273(5) 0.0287(5) -0.0078(4) 0.0046(4) 0.0080(4) 
O4 0.0239(5) 0.0170(4) 0.0349(5) 0.0024(4) 0.0031(4) -0.0029(3) 
O5 0.0264(5) 0.0154(4) 0.0239(5) 0.0030(3) 0.0000(4) 0.0034(3) 
O6 0.0276(5) 0.0295(5) 0.0291(5) -0.0091(4) 0.0140(4) -0.0045(4) 
O7 0.0228(4) 0.0176(4) 0.0189(4) -0.0043(3) 0.0054(3) -0.0033(3) 
N1 0.0249(6) 0.0170(5) 0.0229(5) -0.0024(4) 0.0020(4) 0.0015(4) 
N2 0.0189(5) 0.0189(5) 0.0191(5) 0.0003(4) 0.0059(4) 0.0013(4) 
N3 0.0164(5) 0.0193(5) 0.0219(5) -0.0047(4) 0.0046(4) 0.0011(4) 
C1 0.0224(6) 0.0149(5) 0.0195(6) -0.0007(4) 0.0027(5) 0.0021(4) 
C2 0.0237(6) 0.0159(5) 0.0311(7) 0.0036(5) 0.0072(5) -0.0022(4) 
C3 0.0187(6) 0.0200(6) 0.0321(7) 0.0033(5) 0.0084(5) 0.0000(4) 
C4 0.0182(6) 0.0161(5) 0.0174(6) 0.0002(4) 0.0029(4) 0.0006(4) 
C5 0.0205(6) 0.0162(5) 0.0260(6) 0.0010(4) 0.0070(5) -0.0014(4) 
C6 0.0194(6) 0.0197(6) 0.0279(7) -0.0009(4) 0.0080(5) 0.0000(4) 
C7 0.0167(5) 0.0148(5) 0.0189(6) 0.0003(4) 0.0051(4) 0.0002(4) 
C8 0.0250(6) 0.0241(6) 0.0169(6) 0.0003(4) 0.0042(5) 0.0008(5) 
C9 0.0231(6) 0.0235(6) 0.0212(6) -0.0046(4) 0.0035(5) -0.0009(5) 
C10 0.0237(6) 0.0215(5) 0.0178(6) -0.0033(4) 0.0062(5) 0.0004(4) 
C11 0.0191(6) 0.0295(6) 0.0257(7) -0.0103(5) 0.0082(5) -0.0032(5) 
C12 0.0188(6) 0.0185(5) 0.0203(6) -0.0019(4) 0.0041(5) -0.0015(4) 
C13 0.0173(5) 0.0132(5) 0.0178(6) 0.0008(4) 0.0034(4) 0.0011(4) 
C14 0.0170(5) 0.0135(5) 0.0194(6) 0.0004(4) 0.0061(4) 0.0003(4) 
C15 0.0197(6) 0.0158(5) 0.0202(6) 0.0021(4) 0.0073(5) 0.0014(4) 
C16 0.0346(8) 0.0174(6) 0.0265(7) 0.0067(5) 0.0045(6) 0.0069(5) 
C17 0.0404(9) 0.0280(7) 0.0343(8) 0.0016(6) 0.0062(7) 0.0129(6) 
C18 0.0188(6) 0.0141(5) 0.0193(6) 0.0001(4) 0.0045(4) 0.0020(4) 
C19 0.0269(7) 0.0225(6) 0.0216(6) -0.0091(4) 0.0060(5) -0.0007(5) 
C20 0.0257(7) 0.0252(6) 0.0268(7) -0.0083(5) 0.0060(5) -0.0034(5) 
  
_geom_special_details 
; 
 All esds (except the esd in the dihedral angle between two l.s. planes) 
 are estimated using the full covariance matrix.  The cell esds are taken 
 into account individually in the estimation of esds in distances, angles 
 and torsion angles; correlations between esds in cell parameters are only 
 used when they are defined by crystal symmetry.  An approximate (isotropic) 
 treatment of cell esds is used for estimating esds involving l.s. planes. 
; 
  
loop_ 
 _geom_bond_atom_site_label_1 
 _geom_bond_atom_site_label_2 
 _geom_bond_distance 
 _geom_bond_site_symmetry_2 
 _geom_bond_publ_flag 
O1 N1 1.2273(14) . ? 
O2 N1 1.2272(15) . ? 
O3 C10 1.2208(15) . ? 
O4 C15 1.2097(15) . ? 
O5 C15 1.3320(15) . ? 
O5 C16 1.4647(14) . ? 
O6 C18 1.2100(15) . ? 
O7 C18 1.3438(14) . ? 
O7 C19 1.4566(14) . ? 
N1 C1 1.4747(15) . ? 
N2 N3 1.4307(14) . ? 
N2 C8 1.4905(16) . ? 
N2 C7 1.4912(16) . ? 
N3 C10 1.3695(15) . ? 
N3 C11 1.4460(16) . ? 
C1 C2 1.3787(18) . ? 
C1 C6 1.3865(17) . ? 
C2 C3 1.3878(17) . ? 
C2 H2 0.9500 . ? 
C3 C4 1.3966(16) . ? 
C3 H3 0.9500 . ? 
C4 C5 1.3922(17) . ? 
C4 C7 1.5189(15) . ? 
C5 C6 1.3921(16) . ? 
C5 H5 0.9500 . ? 
C6 H6 0.9500 . ? 
C7 C14 1.5425(16) . ? 
C7 H7 1.0000 . ? 
C8 C9 1.5281(18) . ? 
C8 H8A 0.9900 . ? 
C8 H8B 0.9900 . ? 
C9 C10 1.5125(18) . ? 
C9 H9A 0.9900 . ? 
C9 H9B 0.9900 . ? 
C11 C12 1.4935(17) . ? 
C11 H11A 0.9900 . ? 
C11 H11B 0.9900 . ? 
C12 C13 1.3346(17) . ? 
C12 H12 0.9500 . ? 
C13 C18 1.4905(16) . ? 
C13 C14 1.5190(16) . ? 
C14 C15 1.5320(16) . ? 
C14 H14 1.0000 . ? 
C16 C17 1.502(2) . ? 
C16 H16A 0.9900 . ? 
C16 H16B 0.9900 . ? 
C17 H17A 0.9800 . ? 
C17 H17B 0.9800 . ? 
C17 H17C 0.9800 . ? 
C19 C20 1.5020(18) . ? 
C19 H19A 0.9900 . ? 
C19 H19B 0.9900 . ? 
C20 H20A 0.9800 . ? 
C20 H20B 0.9800 . ? 
C20 H20C 0.9800 . ? 
  
loop_ 
 _geom_angle_atom_site_label_1 
 _geom_angle_atom_site_label_2 
 _geom_angle_atom_site_label_3 
 _geom_angle 
 _geom_angle_site_symmetry_1 
 _geom_angle_site_symmetry_3 
 _geom_angle_publ_flag 
C15 O5 C16 116.45(10) . . ? 
C18 O7 C19 114.94(10) . . ? 
O1 N1 O2 123.52(11) . . ? 
O1 N1 C1 118.17(11) . . ? 
O2 N1 C1 118.31(10) . . ? 
N3 N2 C8 103.07(9) . . ? 
N3 N2 C7 110.11(9) . . ? 
C8 N2 C7 111.04(10) . . ? 
C10 N3 N2 113.99(10) . . ? 
C10 N3 C11 124.53(10) . . ? 
N2 N3 C11 115.58(9) . . ? 
C2 C1 C6 122.68(11) . . ? 
C2 C1 N1 118.59(11) . . ? 
C6 C1 N1 118.73(11) . . ? 
C1 C2 C3 118.32(11) . . ? 
C1 C2 H2 120.8 . . ? 
C3 C2 H2 120.8 . . ? 
C2 C3 C4 120.90(12) . . ? 
C2 C3 H3 119.6 . . ? 
C4 C3 H3 119.6 . . ? 
C5 C4 C3 119.11(11) . . ? 
C5 C4 C7 119.58(10) . . ? 
C3 C4 C7 121.28(11) . . ? 
C6 C5 C4 120.88(11) . . ? 
C6 C5 H5 119.6 . . ? 
C4 C5 H5 119.6 . . ? 
C1 C6 C5 118.07(12) . . ? 
C1 C6 H6 121.0 . . ? 
C5 C6 H6 121.0 . . ? 
N2 C7 C4 108.44(9) . . ? 
N2 C7 C14 111.28(9) . . ? 
C4 C7 C14 111.33(9) . . ? 
N2 C7 H7 108.6 . . ? 
C4 C7 H7 108.6 . . ? 
C14 C7 H7 108.6 . . ? 
N2 C8 C9 104.85(10) . . ? 
N2 C8 H8A 110.8 . . ? 
C9 C8 H8A 110.8 . . ? 
N2 C8 H8B 110.8 . . ? 
C9 C8 H8B 110.8 . . ? 
H8A C8 H8B 108.9 . . ? 
C10 C9 C8 101.60(10) . . ? 
C10 C9 H9A 111.4 . . ? 
C8 C9 H9A 111.4 . . ? 
C10 C9 H9B 111.5 . . ? 
C8 C9 H9B 111.4 . . ? 
H9A C9 H9B 109.3 . . ? 
O3 C10 N3 124.50(12) . . ? 
O3 C10 C9 128.87(11) . . ? 
N3 C10 C9 106.62(10) . . ? 
N3 C11 C12 112.32(10) . . ? 
N3 C11 H11A 109.1 . . ? 
C12 C11 H11A 109.1 . . ? 
N3 C11 H11B 109.1 . . ? 
C12 C11 H11B 109.1 . . ? 
H11A C11 H11B 107.9 . . ? 
C13 C12 C11 126.92(11) . . ? 
C13 C12 H12 116.5 . . ? 
C11 C12 H12 116.5 . . ? 
C12 C13 C18 120.15(11) . . ? 
C12 C13 C14 124.91(11) . . ? 
C18 C13 C14 114.71(10) . . ? 
C13 C14 C15 113.03(9) . . ? 
C13 C14 C7 115.70(9) . . ? 
C15 C14 C7 110.41(9) . . ? 
C13 C14 H14 105.6 . . ? 
C15 C14 H14 105.6 . . ? 
C7 C14 H14 105.6 . . ? 
O4 C15 O5 124.21(11) . . ? 
O4 C15 C14 123.69(11) . . ? 
O5 C15 C14 111.98(10) . . ? 
O5 C16 C17 110.17(11) . . ? 
O5 C16 H16A 109.6 . . ? 
C17 C16 H16A 109.6 . . ? 
O5 C16 H16B 109.6 . . ? 
C17 C16 H16B 109.6 . . ? 
H16A C16 H16B 108.1 . . ? 
C16 C17 H17A 109.5 . . ? 
C16 C17 H17B 109.5 . . ? 
H17A C17 H17B 109.5 . . ? 
C16 C17 H17C 109.5 . . ? 
H17A C17 H17C 109.5 . . ? 
H17B C17 H17C 109.5 . . ? 
O6 C18 O7 122.82(11) . . ? 
O6 C18 C13 123.54(11) . . ? 
O7 C18 C13 113.64(10) . . ? 
O7 C19 C20 107.61(10) . . ? 
O7 C19 H19A 110.2 . . ? 
C20 C19 H19A 110.2 . . ? 
O7 C19 H19B 110.2 . . ? 
C20 C19 H19B 110.2 . . ? 
H19A C19 H19B 108.5 . . ? 
C19 C20 H20A 109.5 . . ? 
C19 C20 H20B 109.5 . . ? 
H20A C20 H20B 109.5 . . ? 
C19 C20 H20C 109.5 . . ? 
H20A C20 H20C 109.5 . . ? 
H20B C20 H20C 109.5 . . ? 
  
loop_ 
 _geom_torsion_atom_site_label_1 
 _geom_torsion_atom_site_label_2 
 _geom_torsion_atom_site_label_3 
 _geom_torsion_atom_site_label_4 
 _geom_torsion 
 _geom_torsion_site_symmetry_1 
 _geom_torsion_site_symmetry_2 
 _geom_torsion_site_symmetry_3 
 _geom_torsion_site_symmetry_4 
 _geom_torsion_publ_flag 
C8 N2 N3 C10 14.02(13) . . . . ? 
C7 N2 N3 C10 -104.50(11) . . . . ? 
C8 N2 N3 C11 -140.26(11) . . . . ? 
C7 N2 N3 C11 101.22(12) . . . . ? 
O1 N1 C1 C2 -7.56(17) . . . . ? 
O2 N1 C1 C2 172.28(12) . . . . ? 
O1 N1 C1 C6 172.93(12) . . . . ? 
O2 N1 C1 C6 -7.23(17) . . . . ? 
C6 C1 C2 C3 1.0(2) . . . . ? 
N1 C1 C2 C3 -178.52(11) . . . . ? 
C1 C2 C3 C4 0.7(2) . . . . ? 
C2 C3 C4 C5 -2.1(2) . . . . ? 
C2 C3 C4 C7 175.77(12) . . . . ? 
C3 C4 C5 C6 2.02(19) . . . . ? 
C7 C4 C5 C6 -175.92(12) . . . . ? 
C2 C1 C6 C5 -1.1(2) . . . . ? 
N1 C1 C6 C5 178.42(11) . . . . ? 
C4 C5 C6 C1 -0.46(19) . . . . ? 
N3 N2 C7 C4 -156.42(9) . . . . ? 
C8 N2 C7 C4 90.07(11) . . . . ? 
N3 N2 C7 C14 -33.64(12) . . . . ? 
C8 N2 C7 C14 -147.16(9) . . . . ? 
C5 C4 C7 N2 -141.36(11) . . . . ? 
C3 C4 C7 N2 40.74(15) . . . . ? 
C5 C4 C7 C14 95.89(13) . . . . ? 
C3 C4 C7 C14 -82.01(14) . . . . ? 
N3 N2 C8 C9 -27.81(12) . . . . ? 
C7 N2 C8 C9 90.06(11) . . . . ? 
N2 C8 C9 C10 31.02(12) . . . . ? 
N2 N3 C10 O3 -172.98(12) . . . . ? 
C11 N3 C10 O3 -21.4(2) . . . . ? 
N2 N3 C10 C9 6.06(14) . . . . ? 
C11 N3 C10 C9 157.69(12) . . . . ? 
C8 C9 C10 O3 156.16(14) . . . . ? 
C8 C9 C10 N3 -22.83(13) . . . . ? 
C10 N3 C11 C12 152.16(12) . . . . ? 
N2 N3 C11 C12 -56.61(15) . . . . ? 
N3 C11 C12 C13 -8.86(19) . . . . ? 
C11 C12 C13 C18 -177.90(12) . . . . ? 
C11 C12 C13 C14 -3.74(19) . . . . ? 
C12 C13 C14 C15 -66.71(15) . . . . ? 
C18 C13 C14 C15 107.73(11) . . . . ? 
C12 C13 C14 C7 61.97(15) . . . . ? 
C18 C13 C14 C7 -123.59(11) . . . . ? 
N2 C7 C14 C13 -45.82(13) . . . . ? 
C4 C7 C14 C13 75.28(12) . . . . ? 
N2 C7 C14 C15 84.14(11) . . . . ? 
C4 C7 C14 C15 -154.76(10) . . . . ? 
C16 O5 C15 O4 -3.63(18) . . . . ? 
C16 O5 C15 C14 -179.73(10) . . . . ? 
C13 C14 C15 O4 158.93(12) . . . . ? 
C7 C14 C15 O4 27.56(16) . . . . ? 
C13 C14 C15 O5 -24.94(14) . . . . ? 
C7 C14 C15 O5 -156.31(10) . . . . ? 
C15 O5 C16 C17 -86.91(14) . . . . ? 
C19 O7 C18 O6 -3.67(16) . . . . ? 
C19 O7 C18 C13 175.95(9) . . . . ? 
C12 C13 C18 O6 166.16(12) . . . . ? 
C14 C13 C18 O6 -8.56(16) . . . . ? 
C12 C13 C18 O7 -13.46(15) . . . . ? 
C14 C13 C18 O7 171.82(9) . . . . ? 
C18 O7 C19 C20 -170.25(10) . . . . ? 
  
_diffrn_measured_fraction_theta_max    0.945 
_diffrn_reflns_theta_full              29.00 
_diffrn_measured_fraction_theta_full   0.996 
_refine_diff_density_max    0.581 
_refine_diff_density_min   -0.229 
_refine_diff_density_rms    0.052 
